# Supplementary material for: Gene expression patterns through oral squamous cell carcinoma development: PD-L1 expression in primary tumor and circulating tumor cells
Source: PubMed Central journal article supplement (PMC4673238; doi:10.18632/oncotarget.3939), 2015-05-15
Supplement: oncotarget-06-20902-s001.pdf [file oncotarget-06-20902-s001.pdf]

## SUPPLEMENTARY TABLES

**Supplementary Table 1: Networks identified by IPA, with information of molecules present in dataset and included in the networks**

**Supplementary Table 2: Ingenuity Canonical Pathways, including pathways,  $-\log(p\text{-value})$ ,  $p\text{-value}$ , ratio, z-score and molecules**
